# Supplementary material for: Unusual Repertoire of Vocalizations in the BTBR T+tf/J Mouse Model of Autism
Source: PLoS One. 2008 Aug 27;3(8):e3067. doi: 10.1371/journal.pone.0003067 (PMC2516927; doi:10.1371/journal.pone.0003067)
Supplement: Table S1 — Body Temperature measured after pup separation vocalizations recording. (0.02 MB XLS) [file pone.0003067.s012.xls]

## Sheet: Foglio1
		Table S1. Body Temperature measured after pup separation vocalizations recording
		Strain	pnd 2	pnd 4	pnd 6	pnd 8	pnd 12
		B6	35.3 + 0.32	35.5 + 0.31	36.3 + 0.23	37.0 + 0.17	39.5 + 0.29
		BTBR	35.7 + 0.28	36.1 + 0.22	36.4 + 0.18	37.4 + 0.20	39.5 + 0.22
		129X1	34.9 + 0.13	35.6 + 0.25	36.3 + 0.19	36.7 + 0.28	37.4 + 0.33**
		FVB/NJ	35.5 + 0.15	35.6 + 0.07	36.0 + 0.11	37.2 + 0.17	39.4 + 0.21
		Data are expressed as mean ± SEM. **p< .01 for the comparisons between strains.
